# Supplementary material
Source: MDPI journal article supplement (https://www.mdpi.com/2673-8783/2/3/11)
Supplement: s1 [file s1]

# Enhancing the Efficacy of the Subcritical Water-Based Alkali Lignin Depolymerization by Optimizing the Reaction Conditions and Using Heterogeneous Catalysts

Balawanthrao Jadhav<sup>1\*</sup>, Ranen Roy<sup>1</sup>, Md Sajjadur Rahman<sup>1</sup>, Tanvir A. Amit<sup>1</sup>, Shiksha Subedi<sup>1</sup>, Matthew Hummel<sup>2</sup>, ZhengRong Gu<sup>2</sup>, and Douglas E. Raynie<sup>1\*</sup>

<sup>1</sup>Department of Chemistry and Biochemistry, South Dakota State University, Brookings, SD-57007, USA

<sup>2</sup>Department of Agricultural and Biosystem Engineering, South Dakota State University, Brookings, SD-57007, USA

\*Corresponding Author: [douglas.raynie@sdstate.edu](mailto:douglas.raynie@sdstate.edu)

**Table S1.** Properties of water and subcritical water [1, 2]

| Properties                   | Normal water | Subcritical water |
|------------------------------|--------------|-------------------|
| Temperature (K)              | 298          | 523               |
| Pressure (bar)               | 1            | 50                |
| Density (g/cm <sup>3</sup> ) | 1            | 0.80              |
| Dielectric constant          | 78.5         | 27.1              |
| $p^K_w$                      | 14.0         | 11.2              |
| Heat capacity (kJ/Kg K)      | 4.22         | 4.86              |
| Dynamic viscosity (mPa s)    | 0.89         | 0.11              |
| Heat conductivity (Mw/m K)   | 608          | 620               |

**Table S2.** Phenolic monomers and retention time.

| Peak No | Retention time (min) | Phenolic monomer  | Molecular weight | Moiety |
|---------|----------------------|-------------------|------------------|--------|
| 1       | 3.121                | Phenol            | 94               | H      |
| 2       | 3.899                | Guaiacol          | 124              | G      |
| 3       | 5.024                | Ethyl guaiacol    | 152              | G      |
| 4       | 5.467                | Vinyl guaiacol    | 150              | G      |
| 5       | 5.831                | Propyl guaiacol   | 166              | G      |
| 6       | 6.095                | Vanillin          | 152              | G      |
| 7       | 6.365                | Isoeugenol        | 164              | G      |
| 8       | 6.627                | Acetovanillone    | 166              | G      |
| 9       | 6.895                | Guaiacylacetone   | 180              | G      |
| 10      | 7.226                | Butyrovannillone  | 194              | G      |
| 11      | 7.607                | Homovanillic acid | 182              | G      |
| 12      | 8.155                | Coniferylaldehyde | 178              | G      |

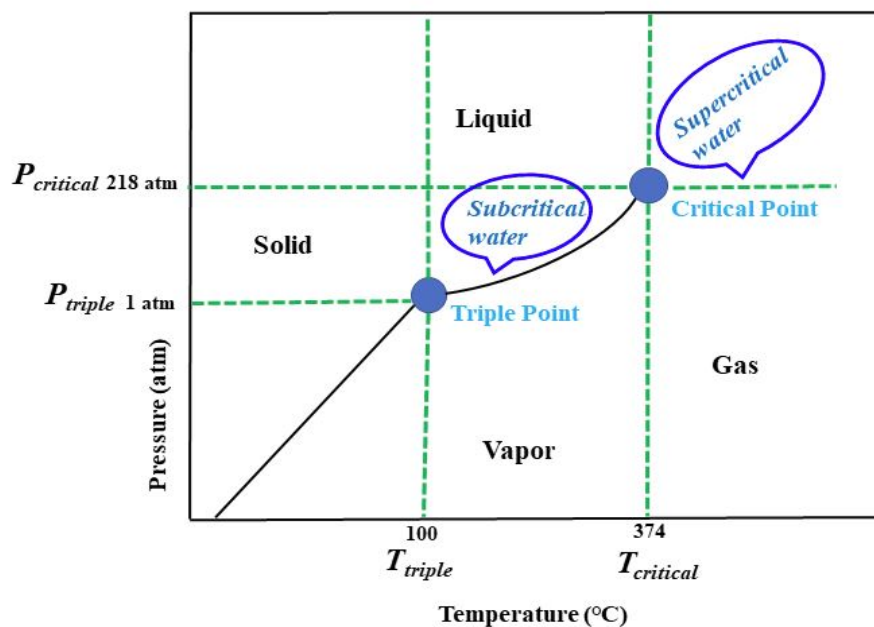

**Figure S1.** Phase diagram of water representing sub and supercritical region.

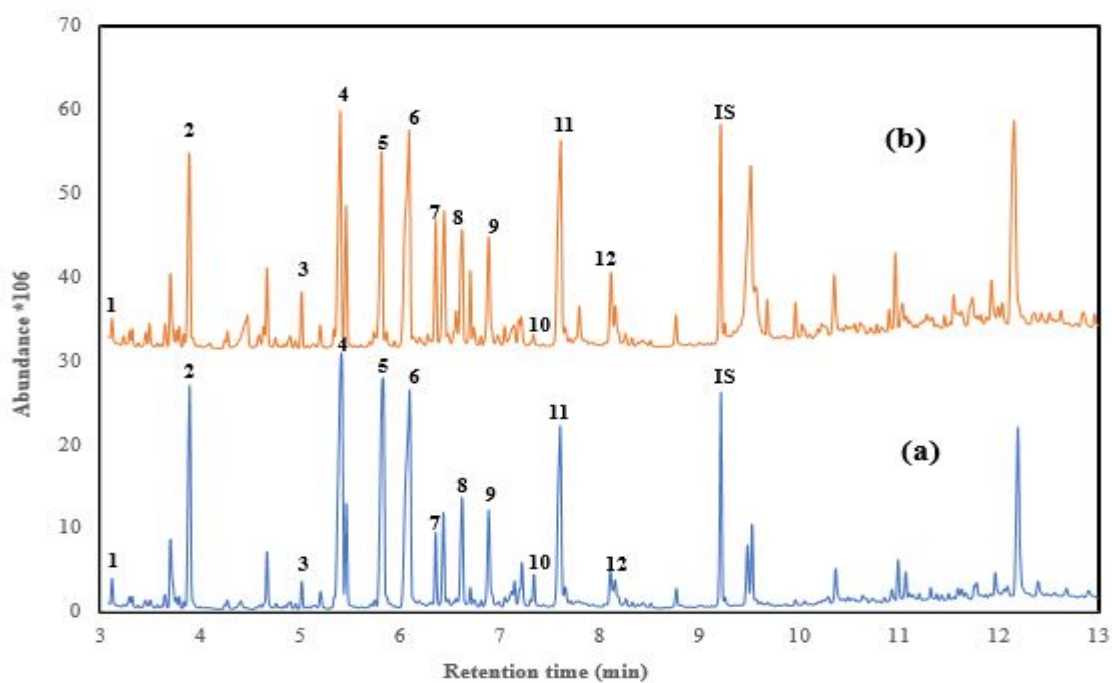

**Figure S2.** GCMS chromatogram of phenolic monomers from the alkali lignin in the presence of (a) 5 % V/Zelite (b) 1.7% V/ZrO<sub>2</sub> (Sulfate)

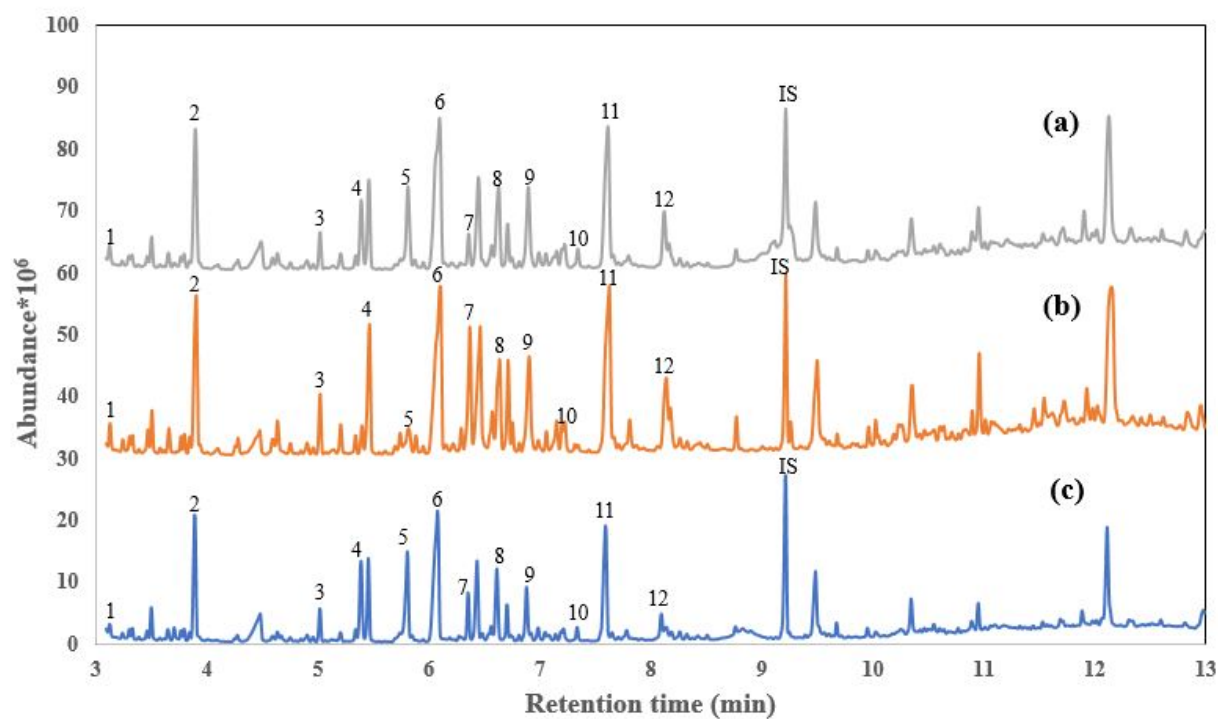

**Figure S3.** GCMS chromatogram of phenolic monomers from the alkali lignin in the presence of (a) 1.7% V/ZrO<sub>2</sub>(Neutral) (b) Ni-Graphene (c) Ni-Zinc catalysts.

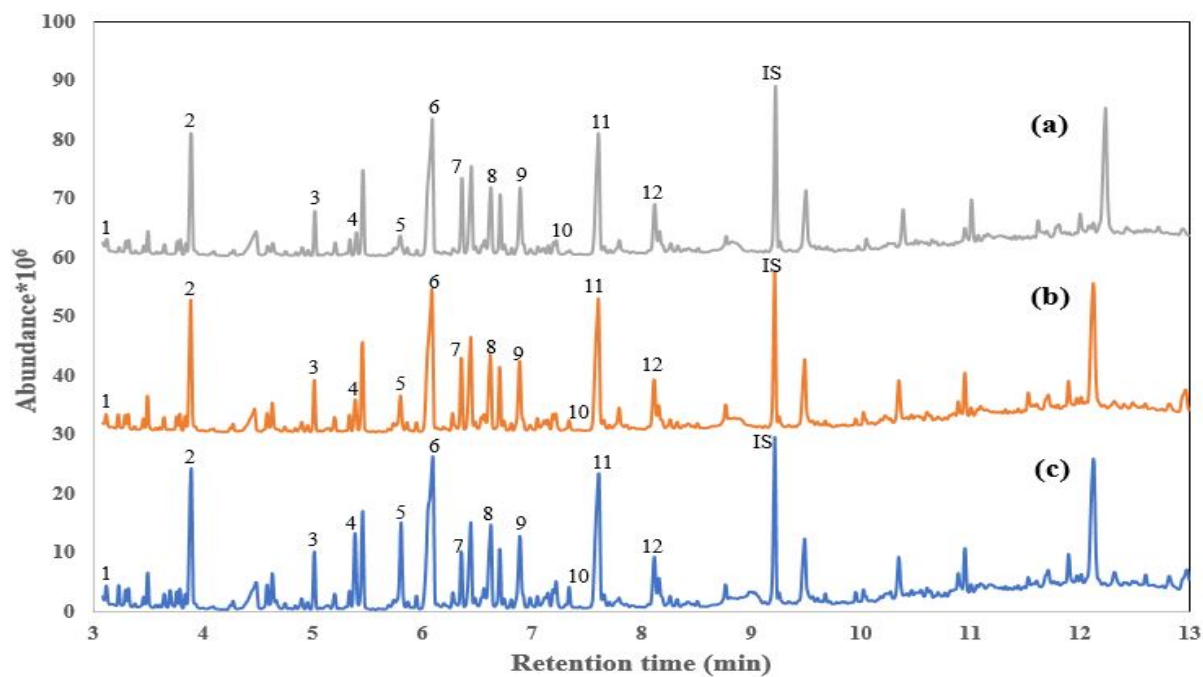

**Figure S4.** GCMS chromatogram of phenolic monomers from the alkali lignin in the presence of (a) 5 % V/Ni-Graphene (b) 1.7 % V/Zelite (c) No catalysts.

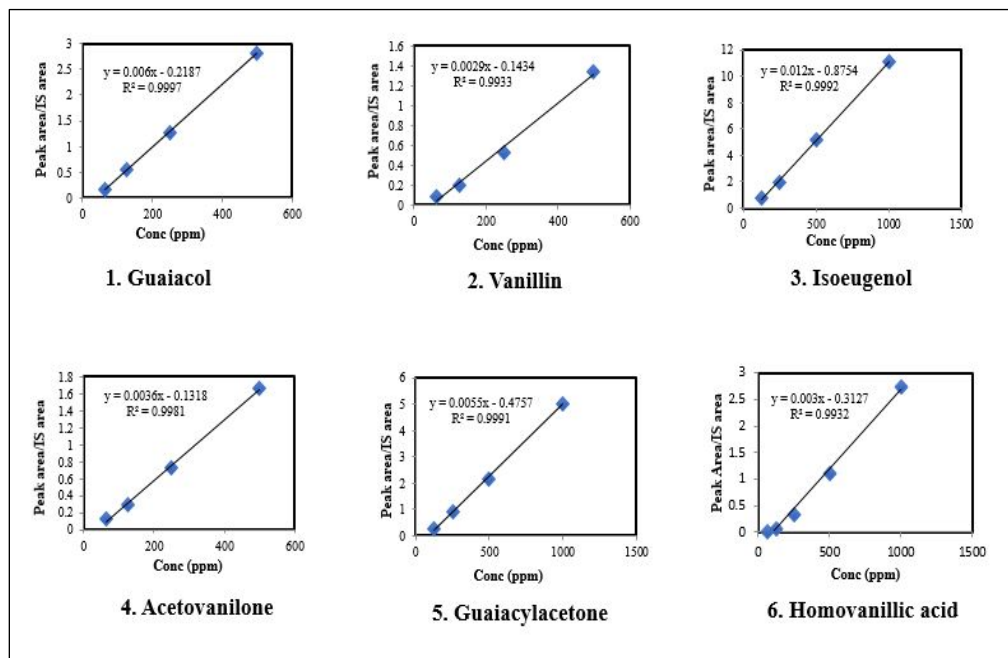

**Figure S5.** Calibration curves for standard phenolic monomers.

1. Kruse, A. and E. Dinjus, *Hot compressed water as reaction medium and reactant: properties and synthesis reactions*. The Journal of supercritical fluids, 2007. **39**(3): p. 362-380.
2. Krammer, P. and H. Vogel, *Hydrolysis of esters in subcritical and supercritical water*. The Journal of Supercritical Fluids, 2000. **16**(3): p. 189-206.
